# Supplementary material
Source: publisher figshare collection journal article supplement (https://f1000.figshare.com/ndownloader/files/1231305)
Supplement: Supplementary file 1 [file 1231305]

shudaprsd	key_press	instructions	fixation	letter_onscreen	stimulus_interval	RT	Hits	CRs	FAs	Misses	or	oh	HR	FAR	Z_HR	Z_FAR	d
0	6	1322.708	1345.352	1346.886	1347.419	0.471	21	201	37	35	2	4	0.35	0.15417	-0.38532	-1.0187	0.6334
0	6			1348.952	1349.485	0.638
0	8			1351.018	1351.552	0.523
0	8			1353.084	1353.617	0.572
0	8			1355.15	1355.683	0.774
0	6			1357.217	1357.75	0.687
0	8			1359.283	1359.816	1
0	6			1361.349	1361.882	1.12
0	6			1363.415	1363.948	1.356
0	6			1365.481	1366.015	1.312
1	6			1367.548	1368.081	1.319
0	6			1369.613	1370.146	1.029
1	8			1371.68	1372.213	0.961
0	6			1373.746	1374.279	0.834
0	6			1375.812	1376.346	1.024
0	6			1377.879	1378.412	0.873
0	6			1379.944	1380.477	0.659
0	8			1382.011	1382.544	0.772
0	6			1384.077	1384.61	0.769
0	6			1386.143	1386.677	1.21
0	6			1388.209	1388.742	1.471
0	6			1390.275	1390.808	1.321
0	6			1392.342	1392.875	0.982
0	6			1394.408	1394.941	1.108
1	8			1396.474	1397.007	1.004
1	6			1398.54	1399.073	0.849
0	6			1400.606	1401.14	1.396
0	6			1402.673	1403.206	0.952
0	8			1404.738	1405.271	1.143
0	6			1406.805	1407.338	0.81
0	8			1408.871	1409.404	1.369
1	6			1410.937	1411.471	0.739
0	6			1413.003	1413.536	1.11
0	6			1415.069	1415.602	1.241
0	6			1417.136	1417.669	1.161
0	6			1419.202	1419.735	1.351
0	8			1421.268	1421.802	1.306
1	6			1423.334	1423.867	1.449
0	8			1425.4	1425.933	1.551
0	6			1427.467	1428	0.808
0	6			1429.533	1430.066	1.039
0	6			1431.599	1432.132	1.434
0	8			1433.665	1434.198	1.149
0	6			1435.731	1436.265	0.976
0	6			1437.798	1438.331	0.778
1	6			1439.863	1440.396	1.625
0	6			1441.93	1442.463	1.509
1	6			1443.996	1444.529	1.377
1	8			1446.062	1446.596	0.829
0	6			1448.128	1448.661	0.942
1	8			1450.194	1450.727	1.132
1	8			1452.261	1452.794	1.368
0	6			1454.327	1454.86	0.831
0	6			1456.393	1456.927	1.056
0	6			1458.459	1458.992	1.568
0	6			1460.525	1461.058	1.723
0	6			1462.592	1463.125	1.408
0	8			1464.658	1465.191	0.9
0	6			1466.724	1467.257	1.038
1	6			1468.79	1469.323	1.192
0	6			1470.856	1471.39	1.324
0	6			1472.923	1473.456	1.43
0	8			1474.988	1475.521	1.692
0	6			1477.055	1477.588	1.423
0	6			1479.121	1479.654	1.32
0	6			1481.187	1481.721	1.288
0	6			1483.253	1483.786	1.173
0	6			1485.319	1485.852	1.404
0	6			1487.386	1487.919	1.294
0	8			1489.452	1489.985	1.319
1	6			1491.518	1492.052	0.888
0	6			1493.584	1494.117	0.849
0	6			1495.65	1496.183	1.215
0	6			1497.717	1498.25	1.199
1	6			1499.783	1500.316	1.149
0	8			1501.849	1502.382	0.788
0	6			1503.915	1504.448	0.79
0	6			1505.981	1506.515	1.156
0	8			1508.048	1508.581	1.227
1	6			1510.113	1510.646	1.324
1	6			1512.18	1512.713	1.32
0	8			1514.246	1514.779	0.555
0	6			1516.312	1516.846	1.342
0	6			1518.378	1518.911	1.509
0	6			1520.444	1520.977	1.611
0	6			1522.511	1523.044	1.764
1	8			1524.577	1525.11	0.741
0	6			1526.643	1527.177	1.171
0	6			1528.709	1529.242	1.285
0	6			1530.775	1531.308	1.358
0	8			1532.842	1533.375	1.166
0	6			1534.908	1535.441	1.32
0	6			1536.974	1537.507	1.077
0	6			1539.04	1539.573	1.659
0	6			1541.106	1541.64	1.181
1	0			1543.173	1543.706	0
0	6			1545.238	1545.771	0.658
0	6			1547.305	1547.838	0.695
1	8			1549.371	1549.904	0.486
0	6			1551.437	1551.971	1.596
0	6			1553.503	1554.036	1.376
1	6			1555.569	1556.102	1.595
1	6			1557.636	1558.169	1.708
0	0			1559.702	1560.235	0
0	8			1561.767	1562.301	0.208
0	6			1563.834	1564.367	0.807
0	6			1565.9	1566.433	0.991
0	6			1567.967	1568.5	1.554
0	6			1570.033	1570.566	1.111
1	8			1572.099	1572.632	0.721
0	6			1574.165	1574.698	0.712
0	6			1576.231	1576.765	0.773
0	6			1578.298	1578.831	1.366
0	6			1580.363	1580.896	1.006
0	8			1582.43	1582.963	0.656
0	6			1584.496	1585.029	0.764
0	6			1586.562	1587.096	0.801
0	6			1588.628	1589.161	1.055
1	6			1590.694	1591.227	1.251
0	6			1592.761	1593.294	0.813
0	6			1594.827	1595.36	0.745
0	6			1596.892	1597.426	0.825
0	6			1598.959	1599.492	0.808
0	6			1601.025	1601.558	1.684
0	6			1603.092	1603.625	1.638
1	8			1605.158	1605.691	0.586
0	6			1607.224	1607.757	0.629
0	6			1609.29	1609.823	0.755
0	6			1611.356	1611.89	0.898
0	6			1613.423	1613.956	0.635
0	6			1615.488	1616.021	1.36
0	6			1617.555	1618.088	1.132
0	8			1619.621	1620.154	1.029
0	8			1621.687	1622.221	1.325
0	6			1623.753	1624.286	0.671
0	6			1625.819	1626.352	0.743
0	6			1627.886	1628.419	0.868
1	8			1629.952	1630.485	0.911
0	6			1632.017	1632.551	0.674
0	6			1634.084	1634.617	1.074
0	6			1636.15	1636.683	1.123
0	8			1638.217	1638.75	1.189
0	6			1640.283	1640.816	0.723
1	6			1642.349	1642.882	1.129
0	6			1644.415	1644.948	0.827
0	6			1646.481	1647.015	0.783
0	6			1648.548	1649.081	0.983
0	6			1650.613	1651.146	1.098
0	6			1652.68	1653.213	0.894
0	6			1654.746	1655.279	1.043
0	6			1656.812	1657.346	0.612
0	6			1658.878	1659.411	0.585
0	6			1660.944	1661.477	1.068
0	6			1663.011	1663.544	0.881
0	6			1665.077	1665.61	0.855
0	6			1667.142	1667.676	0.682
0	6			1669.209	1669.742	0.695
1	8			1671.275	1671.808	0.481
1	8			1673.342	1673.875	0.535
0	6			1675.408	1675.94	0.672
0	6			1677.474	1678.007	0.674
0	6			1679.54	1680.073	1.022
0	8			1681.606	1682.14	1.066
1	6			1683.673	1684.206	0.68
0	8			1685.738	1686.271	0.449
0	6			1687.805	1688.338	0.509
1	6			1689.871	1690.404	0.652
0	6			1691.937	1692.471	0.743
0	6			1694.003	1694.536	0.505
0	6			1696.069	1696.602	0.8
0	6			1698.136	1698.669	0.596
1	6			1700.202	1700.735	0.909
0	8			1702.267	1702.801	0.901
1	6			1704.334	1704.867	0.773
0	6			1706.4	1706.933	0.823
0	6			1708.467	1709	0.484
0	6			1710.532	1711.065	0.804
0	8			1712.599	1713.132	0.829
0	6			1714.665	1715.198	0.544
0	6			1716.731	1717.265	0.945
0	6			1718.798	1719.331	0.524
0	6			1720.863	1721.396	0.744
0	6			1722.93	1723.463	0.605
1	6			1724.996	1725.529	0.918
1	8			1727.062	1727.596	0.504
0	6			1729.128	1729.661	0.6
1	6			1731.194	1731.727	0.89
0	6			1733.261	1733.794	0.809
0	6			1735.327	1735.86	1.069
0	6			1737.392	1737.926	1.161
0	8			1739.459	1739.992	0.553
1	6			1741.525	1742.058	0.672
0	6			1743.592	1744.125	0.791
1	8			1745.657	1746.19	1.257
0	6			1747.724	1748.257	0.995
0	6			1749.79	1750.323	0.933
0	6			1751.856	1752.39	0.988
0	6			1753.922	1754.456	1.195
0	6			1755.988	1756.521	0.863
0	6			1758.055	1758.588	0.871
0	6			1760.121	1760.654	1.172
1	6			1762.187	1762.721	1.133
0	6			1764.253	1764.786	1.147
0	6			1766.319	1766.852	1.32
0	6			1768.386	1768.919	1.239
0	6			1770.452	1770.985	1.083
0	6			1772.517	1773.051	1.397
1	8			1774.584	1775.117	1.094
0	6			1776.65	1777.183	1.073
0	8			1778.717	1779.25	0.681
0	6			1780.782	1781.315	1.739
1	6			1782.849	1783.382	1.395
1	8			1784.915	1785.448	0.495
1	6			1786.981	1787.515	1.16
0	6			1789.048	1789.581	1.817
1	0			1791.113	1791.646	0
0	6			1793.18	1793.713	0.638
0	6			1795.246	1795.779	0.758
0	8			1797.312	1797.846	0.748
0	6			1799.378	1799.911	0.757
1	6			1801.444	1801.977	0.882
1	0			1803.511	1804.044	0
0	6			1805.577	1806.11	0.353
0	6			1807.642	1808.176	0.825
1	8			1809.709	1810.242	0.849
1	0			1811.775	1812.308	0
0	0			1813.842	1814.375	0
0	8			1815.907	1816.44	0.757
0	6			1817.974	1818.507	0.454
1	8			1820.04	1820.573	0.854
0	6			1822.106	1822.64	0.517
0	6			1824.172	1824.705	1.035
0	6			1826.238	1826.771	0.721
0	6			1828.305	1828.838	1.261
0	8			1830.371	1830.904	0.895
0	6			1832.437	1832.971	0.375
0	6			1834.503	1835.036	0.472
0	6			1836.569	1837.102	0.421
0	6			1838.636	1839.169	0.71
0	6			1840.702	1841.235	0.648
0	6			1842.767	1843.301	0.75
0	6			1844.834	1845.367	0.728
0	6			1846.9	1847.433	0.684
0	6			1848.967	1849.5	0.656
1	6			1851.032	1851.565	0.618
0	8			1853.099	1853.632	0.485
1	6			1855.165	1855.698	0.388
0	8			1857.231	1857.765	0.718
0	6			1859.297	1859.83	0.469
0	6			1861.363	1861.896	0.822
0	6			1863.43	1863.963	0.701
0	6			1865.496	1866.029	0.885
0	8			1867.561	1868.096	0.601
0	6			1869.628	1870.161	0.544
1	6			1871.694	1872.227	0.341
0	6			1873.761	1874.294	0.817
1	8			1875.827	1876.36	0.737
0	6			1877.892	1878.426	0.594
0	6			1879.959	1880.492	0.748
0	6			1882.025	1882.558	0.739
0	6			1884.092	1884.625	0.746
0	6			1886.157	1886.69	0.579
0	8			1888.224	1888.757	0.815
0	6			1890.29	1890.823	0.518
1	6			1892.356	1892.89	0.773
0	6			1894.422	1894.955	1.051
1	6			1896.488	1897.021	1.047
0	8			1898.555	1899.088	0.709
1	8			1900.621	1901.154	0.564
0	6			1902.686	1903.22	0.386
0	6			1904.753	1905.286	0.78
1	6			1906.819	1907.352	0.777
0	6			1908.886	1909.419	0.842
0	6			1910.951	1911.485	0.506
0	6			1913.017	1913.551	0.977
0	6			1915.084	1915.617	1.189
0	6			1917.15	1917.683	0.828
0	6			1919.217	1919.75	0.742
0	6			1921.282	1921.815	0.839
1	6			1923.349	1923.882	1.936
0	6			1925.415	1925.948	1.681
0	6			1927.481	1928.015	0.827
1	6			1929.547	1930.08	0.59
0	6			1931.613	1932.146	0.58
0	6			1933.68	1934.213	0.711
0	6			1935.746	1936.279	0.73
1	8			1937.811	1938.345	0.429
0	6			1939.878	1940.411	0.882
0	6			1941.944	1942.477	0.784
0	6			1944.011	1944.544	0.651
0	8			1946.076	1946.609	0.754
1	6			1948.142	1948.676	1.002
0	6			1950.209	1950.742	0.822
0	6			1952.275	1952.808	0.936
0	6			1954.342	1954.875	0.72
0	6			1956.407	1956.94	0.941
0	6			1958.474	1959.007	0.866
0	6			1960.54	1961.073	1.108
0	6			1962.606	1963.14	1.146
0	6			1964.672	1965.205	0.545
